# Supplementary material for: Enhanced photovoltaic properties of TiO2 film prepared by polycondensation in sol reaction
Source: Royal Society of Chemistry journal article supplement (doi:10.1039/c2ra01218a), 2012-01-01
Supplement: c2ra01218a.pdf [file c2ra01218a.pdf]

## Supporting Information Data

# Enhanced Photovoltaic Properties of TiO<sub>2</sub> Film Prepared by Polycondensation in Sol Reaction

**Kyung-Jun Hwang,<sup>a</sup> Seung-Joon Yoo,<sup>b</sup> Jae-Wook Lee,<sup>\*c</sup> Wang-Geun Shim,<sup>\*d</sup>**

<sup>a</sup>*Konkuk University-Fraunhofer ISE Next Generation Solar Cell Research Center (KFnSC), Konkuk University, Seoul 143-701, Korea.*

<sup>b</sup>*Environmental and Chemical Engineering, Seonam University, Namwon 590-711, Korea*

<sup>c</sup>*Department of Chemical Engineering, Chosun University, Gwangju 501-759, Korea.*

<sup>d</sup>*School of Applied Chemical Engineering, Chonnam National University, Gwangju 500-757, Korea.*

E-mail: [jwlee@chosun.ac.kr](mailto:jwlee@chosun.ac.kr) and [wgshim@hotmail.com](mailto:wgshim@hotmail.com); Tel: +82-62-230-715 and +82-62-530-0793

**Table S1.** Langmuir isotherm parameters of N719 dye on various TiO<sub>2</sub> films at three different temperatures

| Sample No.    | Temperature, K | $q_m$ | $b$   | <sup>a</sup> $E$ , % |
|---------------|----------------|-------|-------|----------------------|
| <b>KYJ-1F</b> | 303.15         | 23.96 | 5.214 | 0.956                |
|               | 318.15         | 24.02 | 10.25 | 1.411                |
|               | 333.15         | 30.98 | 13.73 | 1.859                |
| <b>KYJ-2F</b> | 303.15         | 44.47 | 6.716 | 0.922                |
|               | 318.15         | 50.37 | 12.10 | 1.615                |
|               | 333.15         | 54.57 | 15.09 | 4.916                |
| <b>KYJ-3F</b> | 303.15         | 50.16 | 6.754 | 5.578                |
|               | 318.15         | 56.69 | 12.39 | 2.094                |
|               | 333.15         | 60.73 | 15.19 | 4.011                |
| <b>KYJ-4F</b> | 303.15         | 34.49 | 5.927 | 1.983                |
|               | 318.15         | 35.00 | 11.32 | 1.965                |
|               | 333.15         | 41.04 | 14.23 | 2.481                |
| <b>KYJ-5F</b> | 303.15         | 65.46 | 8.401 | 3.158                |
|               | 318.15         | 67.61 | 12.42 | 3.000                |
|               | 333.15         | 69.78 | 15.69 | 5.083                |
| <b>KYJ-6F</b> | 303.15         | 73.72 | 9.120 | 3.945                |
|               | 318.15         | 75.76 | 12.64 | 2.850                |
|               | 333.15         | 76.33 | 16.47 | 4.972                |

<sup>a</sup>: Average percent error,  $E(\%) = 100/N \sum_{i=1}^N [|q_{cal,i} - q_{exp,i}/q_{cal,i}|]$

**Table S2.** Langmuir-Freundlich isotherm parameters of N719 dye on various TiO<sub>2</sub> films at three different temperatures

| Sample No.    | Temperature, K | $q_m$ | $b$   | $n$   | <sup>a</sup> $E$ , % |
|---------------|----------------|-------|-------|-------|----------------------|
| <b>KYJ-1F</b> | 303.15         | 24.04 | 5.18  | 0.998 | 0.347                |
|               | 318.15         | 24.25 | 10.03 | 0.990 | 0.753                |
|               | 333.15         | 31.38 | 13.32 | 0.984 | 1.336                |
| <b>KYJ-2F</b> | 303.15         | 45.55 | 6.38  | 0.985 | 0.845                |
|               | 318.15         | 51.55 | 11.46 | 0.974 | 1.039                |
|               | 333.15         | 56.34 | 13.93 | 0.970 | 3.641                |
| <b>KYJ-3F</b> | 303.15         | 51.30 | 6.43  | 0.983 | 4.885                |
|               | 318.15         | 58.35 | 11.57 | 0.967 | 2.258                |
|               | 333.15         | 62.21 | 14.34 | 0.968 | 4.798                |
| <b>KYJ-4F</b> | 303.15         | 34.64 | 5.87  | 0.997 | 1.857                |
|               | 318.15         | 35.40 | 11.03 | 0.988 | 1.362                |
|               | 333.15         | 41.65 | 13.74 | 0.981 | 2.033                |
| <b>KYJ-5F</b> | 303.15         | 66.89 | 8.00  | 0.981 | 0.704                |
|               | 318.15         | 69.78 | 11.52 | 0.964 | 2.741                |
|               | 333.15         | 72.87 | 14.12 | 0.944 | 2.780                |
| <b>KYJ-6F</b> | 303.15         | 74.82 | 8.84  | 0.978 | 0.884                |
|               | 318.15         | 78.45 | 11.63 | 0.960 | 3.881                |
|               | 333.15         | 79.74 | 14.80 | 0.941 | 4.980                |

<sup>a</sup>: Average percent error,  $E(\%) = 100/N \sum_{i=1}^N [|q_{cal,i} - q_{exp,i}/q_{cal,i}|]$

**Table S3.** Langmuir isotherm parameters of N719 dye on various TiO<sub>2</sub> films in terms of pH at 333.15 K

| Sample No.    | pH | $q_m$ | $b$   | <sup>a</sup> $E, \%$ |
|---------------|----|-------|-------|----------------------|
| <b>KYJ-1F</b> | 3  | 29.62 | 60.03 | 1.917                |
|               | 5  | 26.70 | 46.79 | 0.730                |
|               | 7  | 20.18 | 35.32 | 1.306                |
| <b>KYJ-2F</b> | 3  | 43.39 | 66.79 | 4.157                |
|               | 5  | 38.78 | 62.62 | 2.588                |
|               | 7  | 26.30 | 55.11 | 3.052                |
| <b>KYJ-3F</b> | 3  | 57.66 | 69.52 | 1.210                |
|               | 5  | 52.63 | 64.35 | 2.034                |
|               | 7  | 39.54 | 55.96 | 3.672                |
| <b>KYJ-4F</b> | 3  | 42.90 | 61.32 | 3.618                |
|               | 5  | 38.15 | 59.34 | 2.246                |
|               | 7  | 25.70 | 45.63 | 3.922                |
| <b>KYJ-5F</b> | 3  | 58.30 | 81.50 | 2.778                |
|               | 5  | 52.75 | 78.94 | 1.686                |
|               | 7  | 39.94 | 65.72 | 1.452                |
| <b>KYJ-6F</b> | 3  | 76.39 | 86.74 | 1.604                |
|               | 5  | 69.49 | 79.79 | 2.321                |
|               | 7  | 49.25 | 67.35 | 0.925                |

<sup>a</sup>: Average percent error,  $E(\%) = 100/N \sum_{i=1}^N [|q_{cal,i} - q_{exp,i}/q_{cal,i}|]$

**Table S4.** Langmuir isotherm parameters of N719 dye on various TiO<sub>2</sub> films in terms of pH at 333.15 K

| Sample No.    | pH | $q_m$ | $b$   | $n$   | <sup>a</sup> $E$ , % |
|---------------|----|-------|-------|-------|----------------------|
| <b>KYJ-1F</b> | 3  | 30.12 | 58.41 | 0.943 | 1.067                |
|               | 5  | 26.96 | 45.86 | 0.971 | 0.711                |
|               | 7  | 20.31 | 34.83 | 0.983 | 1.305                |
| <b>KYJ-2F</b> | 3  | 44.18 | 64.60 | 0.936 | 2.839                |
|               | 5  | 39.13 | 61.48 | 0.969 | 1.840                |
|               | 7  | 26.52 | 54.07 | 0.974 | 1.146                |
| <b>KYJ-3F</b> | 3  | 58.92 | 66.91 | 0.921 | 2.376                |
|               | 5  | 53.22 | 62.93 | 0.961 | 2.517                |
|               | 7  | 39.94 | 54.72 | 0.968 | 4.067                |
| <b>KYJ-4F</b> | 3  | 44.27 | 57.69 | 0.898 | 1.498                |
|               | 5  | 39.34 | 55.54 | 0.905 | 0.900                |
|               | 7  | 26.57 | 42.31 | 0.910 | 2.249                |
| <b>KYJ-5F</b> | 3  | 60.66 | 75.49 | 0.860 | 1.278                |
|               | 5  | 54.34 | 74.36 | 0.894 | 0.936                |
|               | 7  | 41.05 | 61.97 | 0.908 | 2.315                |
| <b>KYJ-6F</b> | 3  | 80.60 | 77.57 | 0.817 | 1.419                |
|               | 5  | 71.57 | 75.51 | 0.890 | 1.345                |
|               | 7  | 50.75 | 63.30 | 0.898 | 2.170                |

<sup>a</sup>: Average percent error,  $E(\%) = 100/N \sum_{i=1}^N [|q_{cal,i} - q_{exp,i}/q_{cal,i}|]$

**Table S5.** AED parameters of N719 dye on various TiO<sub>2</sub> films in terms of pH

| Sample No.    | pH | Peak location,<br>kJ/mol | Peak width,<br>kJ/mol | Peak max,<br>kJ/mol | Peak height,<br>mol/kJ |
|---------------|----|--------------------------|-----------------------|---------------------|------------------------|
| <b>KYJ-1F</b> | 3  | 2.94-15.34               | 12.40                 | 9.24                | 0.176                  |
|               | 5  | 2.10-14.50               | 12.40                 | 8.61                | 0.180                  |
|               | 7  | 1.05-13.66               | 12.61                 | 7.77                | 0.179                  |
| <b>KYJ-2F</b> | 3  | 0-18.49                  | 18.49                 | 9.45                | 0.125                  |
|               | 5  | 1.89-17.44               | 15.55                 | 9.24                | 0.146                  |
|               | 7  | 1.05-15.97               | 14.92                 | 8.82                | 0.153                  |
| <b>KYJ-3F</b> | 3  | 4.41-15.13               | 10.72                 | 9.66                | 0.197                  |
|               | 5  | 4.20-14.71               | 10.51                 | 9.45                | 0.207                  |
|               | 7  | 3.99-14.08               | 10.09                 | 9.24                | 0.214                  |
| <b>KYJ-4F</b> | 3  | 0.84-17.65               | 16.81                 | 9.45                | 0.137                  |
|               | 5  | 0-16.18                  | 16.18                 | 9.45                | 0.153                  |
|               | 7  | 0-14.50                  | 14.50                 | 8.40                | 0.164                  |
| <b>KYJ-5F</b> | 3  | 3.15-18.07               | 14.92                 | 9.87                | 0.150                  |
|               | 5  | 2.73-16.39               | 13.66                 | 9.87                | 0.164                  |
|               | 7  | 3.99-14.92               | 10.93                 | 9.66                | 0.195                  |
| <b>KYJ-6F</b> | 3  | 3.78-16.81               | 13.03                 | 10.29               | 0.169                  |
|               | 5  | 5.04-15.34               | 10.30                 | 10.08               | 0.207                  |
|               | 7  | 4.20-14.50               | 10.30                 | 9.45                | 0.211                  |

**Table S6.** AED parameters of N719 dye on various TiO<sub>2</sub> films in terms of temperature

| Sample No.    | Temperature, K | Peak location,<br>kJ/mol | Peak width,<br>kJ/mol | Peak max,<br>kJ/mol | Peak height,<br>mol/kJ |
|---------------|----------------|--------------------------|-----------------------|---------------------|------------------------|
| <b>KYJ-1F</b> | 303.15         | 0-7.14                   | 7.14                  | 2.94                | 0.227                  |
|               | 318.15         | 0-9.03                   | 9.03                  | 3.78                | 0.223                  |
|               | 333.15         | 0-10.50                  | 10.50                 | 4.62                | 0.198                  |
| <b>KYJ-2F</b> | 303.15         | 0-7.56                   | 7.56                  | 3.15                | 0.238                  |
|               | 318.15         | 0-9.45                   | 9.45                  | 3.99                | 0.218                  |
|               | 333.15         | 0-11.13                  | 11.13                 | 4.83                | 0.192                  |
| <b>KYJ-3F</b> | 303.15         | 0-7.56                   | 7.56                  | 3.15                | 0.241                  |
|               | 318.15         | 0-9.66                   | 9.66                  | 4.20                | 0.213                  |
|               | 333.15         | 0-11.13                  | 11.13                 | 5.04                | 0.191                  |
| <b>KYJ-4F</b> | 303.15         | 0-7.35                   | 7.35                  | 3.15                | 0.236                  |
|               | 318.15         | 0-9.45                   | 9.45                  | 3.99                | 0.218                  |
|               | 333.15         | 0-10.71                  | 10.71                 | 4.83                | 0.195                  |
| <b>KYJ-5F</b> | 303.15         | 0-7.98                   | 7.98                  | 3.36                | 0.242                  |
|               | 318.15         | 0-9.66                   | 9.66                  | 4.20                | 0.213                  |
|               | 333.15         | 0-11.13                  | 11.13                 | 4.83                | 0.193                  |
| <b>KYJ-6F</b> | 303.15         | 0-8.19                   | 8.19                  | 3.78                | 0.237                  |
|               | 318.15         | 0-9.66                   | 9.66                  | 4.62                | 0.213                  |
|               | 333.15         | 0-11.55                  | 11.55                 | 5.04                | 0.188                  |
